# Supplementary material
Source: Research Square preprint supplement (doi:10.21203/rs.3.rs-9713671/v1)
Supplement: Supplementary file 1 [file 8a42fcb7454083f5f839f6f3.pdf]

Table 1: Sociodemographic and lifestyle characteristics of participants (n=338)

| Variable                                     | n (%) or mean $\pm$ SD or median [IQR] |
|----------------------------------------------|----------------------------------------|
| Age (years)                                  | 53.8 $\pm$ 8.8                         |
| Age Categories                               |                                        |
| 30 – 40                                      | 34 (10.1)                              |
| 41 – 50                                      | 76 (22.5)                              |
| 51 – 60                                      | 126 (37.3)                             |
| 61 – 64                                      | 102 (30.2)                             |
| Gender                                       |                                        |
| Male                                         | 142 (42.0)                             |
| Female                                       | 196 (58.0)                             |
| Ethnicity                                    |                                        |
| Malay                                        | 263 (77.8)                             |
| Chinese                                      | 22 (6.5)                               |
| Indian                                       | 48 (14.2)                              |
| Others                                       | 5 (1.5)                                |
| Education level                              |                                        |
| None                                         | 5 (1.5)                                |
| Primary                                      | 19 (5.6)                               |
| Secondary                                    | 205 (60.7)                             |
| Tertiary                                     | 109 (32.2)                             |
| Years of education                           | 11.5 $\pm$ 3.2                         |
| Marital status                               |                                        |
| Single                                       | 22 (6.5)                               |
| Married                                      | 277 (82.0)                             |
| Divorced/Widowed                             | 39 (11.5)                              |
| Occupational status                          |                                        |
| Unemployed                                   | 135 (40.0)                             |
| Part-time job                                | 27 (8.0)                               |
| Full-time job                                | 136 (40.2)                             |
| Retired                                      | 40 (11.8)                              |
| B40 Household Income Categories <sup>a</sup> |                                        |
| Less than RM3,480 (B1)                       | 152 (45.0)                             |
| RM3,480 - RM4,659 (B2)                       | 66 (19.5)                              |
| RM4,660 - RM5,839 (B3)                       | 65 (19.2)                              |
| RM5,840 - RM6,959 (B4)                       | 55 (16.3)                              |
| Monthly household income (RM)                | 3,6780 $\pm$ 1,787                     |
| Number of household members                  | 3.9 $\pm$ 1.8                          |
| Number of children                           | 0.7 $\pm$ 1.2                          |
| Number of elderly                            | 0.2 $\pm$ 0.5                          |
| Number of working adults                     | 1.4 $\pm$ 0.9                          |
| Financial aid                                |                                        |
| Yes                                          | 179 (53.0)                             |
| No                                           | 159 (47.0)                             |
| Sleeping hours                               | 6.4 $\pm$ 1.4                          |
| Sleeping difficulty                          |                                        |
| Yes                                          | 107 (31.7)                             |
| No                                           | 231 (68.3)                             |
| Physical activity                            |                                        |

|                                                                                       |                 |
|---------------------------------------------------------------------------------------|-----------------|
| MET-minutes/week                                                                      | 347 [33-1386]   |
| Physical activity category                                                            |                 |
| Low (<600 MET-minutes/week)                                                           | 210 (62.2)      |
| Moderate (600-2,999 MET-minutes/week)                                                 | 90 (26.6)       |
| High ( $\geq 3,000$ MET-min/week or $\geq 1,500$ MET-min/week with vigorous activity) | 38 (11.2)       |
| Stress level                                                                          |                 |
| Stress score                                                                          | 9.0 $\pm$ 7.7   |
| Stress Category                                                                       |                 |
| Low                                                                                   | 223 (66.0)      |
| Moderate                                                                              | 112 (33.1)      |
| High                                                                                  | 3 (0.9)         |
| Smoking habits                                                                        |                 |
| Yes                                                                                   | 84 (24.9)       |
| No                                                                                    | 254 (75.1)      |
| Still smoking (n=44) (years)                                                          | 25.6 $\pm$ 13.1 |
| Stopped smoking (n=42) (years)                                                        | 15.6 $\pm$ 26.2 |

<sup>a</sup>Department of Statistics Malaysia (2019); B40: bottom 40% of the household income population; MET metabolic equivalent task
