# Supplementary material
Source: Research Square preprint supplement (doi:10.21203/rs.3.rs-9713671/v1)
Supplement: Supplementary file 2 [file a5152401f56d2d54dfa060ff.pdf]

Table 2: Clinical, nutritional, and food insecurity characteristics of participants (n=338)

| Variable                             | n (%) or mean $\pm$ SD        |
|--------------------------------------|-------------------------------|
| Number of NCDs                       | 2.6 $\pm$ 0.8; most common: 3 |
| T2D                                  |                               |
| Yes                                  | 263 (77.8)                    |
| No                                   | 75 (22.2)                     |
| Hypertension                         |                               |
| Yes                                  | 272 (80.2)                    |
| No                                   | 67 (19.8)                     |
| Dyslipidemia                         |                               |
| Yes                                  | 288 (85.2)                    |
| No                                   | 50 (14.8)                     |
| Other NCDs                           |                               |
| Yes                                  | 57 (16.9)                     |
| No                                   | 281 (83.1)                    |
| Anthropometry measurements           |                               |
| Height (m)                           | 1.60 $\pm$ 0.10               |
| Weight (kg)                          | 77.9 $\pm$ 18.9               |
| BMI (kg/m <sup>2</sup> )             | 30.1 $\pm$ 6.0                |
| BMI Categories (Asians) <sup>a</sup> |                               |
| Underweight                          | 1 (0.3)                       |
| Normal                               | 28 (8.3)                      |
| Overweight                           | 98 (29.0)                     |
| Obese I                              | 107 (31.7)                    |
| Obese II                             | 72 (21.3)                     |
| Obese III                            | 32 (9.4)                      |
| Waist circumference (cm) (n=329)     | 98.0 $\pm$ 13.3               |
| Male (cm) (n=140)                    | 101.1 $\pm$ 15.3              |
| Female (cm) (n=189)                  | 95.8 $\pm$ 11.1               |
| Vital signs                          |                               |
| Systolic BP (mmHg)                   | 134.8 $\pm$ 14.9              |
| Diastolic BP (mmHg)                  | 78.1 $\pm$ 9.5                |
| Biochemical data                     |                               |
| FBG (n=288) (mmol/L)                 | 7.7 $\pm$ 2.8                 |
| RBG (n=128) (mmol/L)                 | 8.9 $\pm$ 3.6                 |
| HbA1c (n=257) (%)                    | 7.9 $\pm$ 1.8                 |
| TC (mmol/L)                          | 4.9 $\pm$ 1.2                 |
| LDL-C (mmol/L)                       | 2.9 $\pm$ 1.1                 |
| HDL-C (mmol/L)                       | 1.3 $\pm$ 0.3                 |
| TG (n=337) (mmol/L)                  | 1.6 $\pm$ 0.9                 |
| FRS Classification                   |                               |
| Low Risk                             | 85 (25.2)                     |
| Moderate Risk                        | 119 (35.2)                    |
| High Risk                            | 134 (39.6)                    |
| Food Security Status                 |                               |
| Food Secure                          | 240 (71.0)                    |
| Food Insecure                        | 98 (29.0)                     |
| FIES Category                        |                               |
| Food secure                          | 240 (71.0)                    |

|                                                         |            |
|---------------------------------------------------------|------------|
| Mild FI                                                 | 73 (21.6)  |
| Moderate FI                                             | 21 (6.2)   |
| Severe FI                                               | 4 (1.2)    |
| Coping strategies                                       |            |
| MCSI Score                                              | 9 [6-15]   |
| Food secure (1 <sup>st</sup> tertile MCSI)              | 56 (16.6)  |
| Moderately food insecure (2 <sup>nd</sup> tertile MCSI) | 176 (52.1) |
| Severely food insecure (3 <sup>rd</sup> tertile MCSI)   | 106 (31.4) |

NCD: non-communicable disease; T2D: type 2 diabetes; BMI: body mass index; BP: blood pressure; FBG: fasting blood glucose; RBG: random blood glucose; HbA1c: hemoglobin A1c; TC: total cholesterol; LDL-C: low-density lipoprotein cholesterol; HDL-C: high-density lipoprotein cholesterol; TG: triglyceride; FRS: Framingham risk score; FI: Food Insecurity; FIES: Food Insecurity Experience Scale; MCSI: Malaysian Coping Strategy Instrument

<sup>a</sup>World Health Organization Expert Consultation (2004)
